# Supplementary material for: Dopant-mediated carrier tunneling in short-channel two-dimensional transistors
Source: Royal Society of Chemistry journal article supplement (doi:10.1039/d4qm00494a), 2024-01-01
Supplement: d4qm00494a1.pdf [file d4qm00494a1.pdf]

## Supporting Information for

# Dopant-Mediated Carrier Tunneling in Short-Channel Two-Dimensional Transistors

Yue Lu<sup>1#</sup>, Chenyu Li<sup>1#</sup>, Shenbo Yang<sup>2</sup>, Mingxuan Yuan<sup>1</sup>, Shuo Qiao<sup>1</sup>, Qingqing Ji<sup>1\*</sup>

<sup>1</sup>School of Physical Science and Technology, ShanghaiTech University, Shanghai 201210, China

<sup>2</sup>Hongzhiwei Technology (Shanghai) Co., Ltd., Shanghai 201210, China

<sup>#</sup>These authors contribute equally to this work.

\*To whom correspondence should be addressed. E-mail: [jiqq@shanghaitech.edu.cn](mailto:jiqq@shanghaitech.edu.cn)

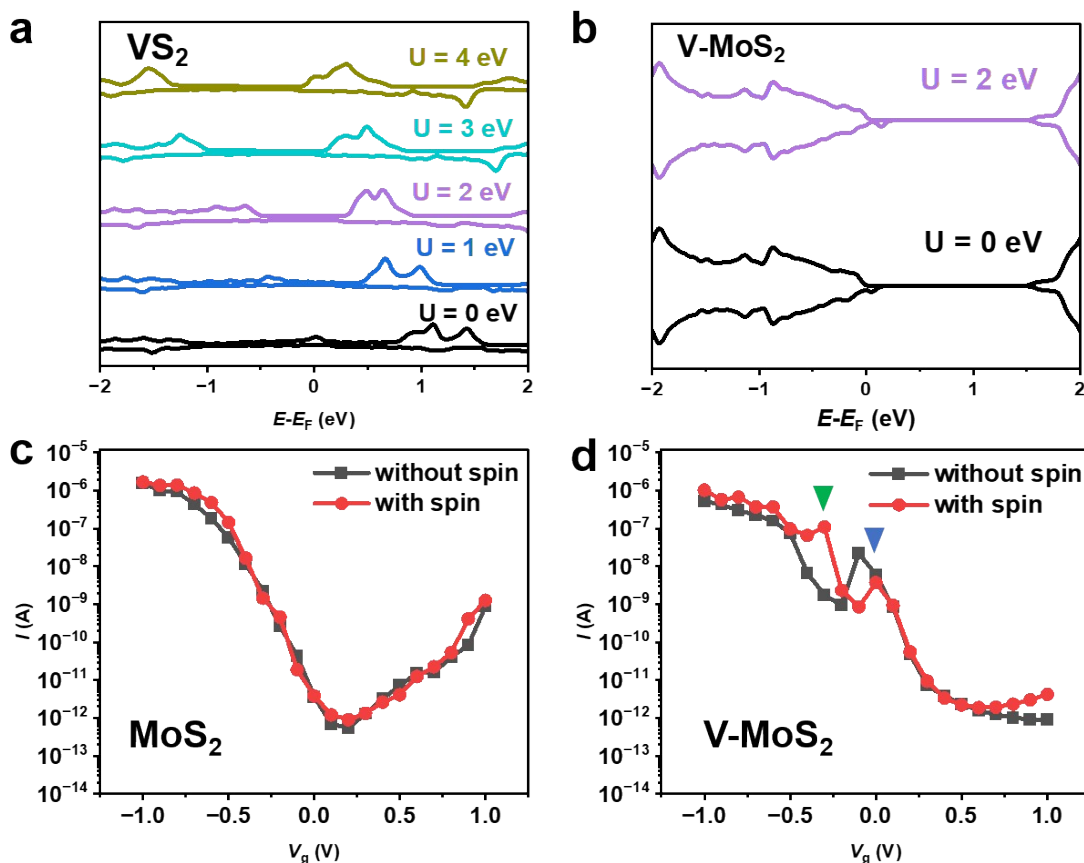

**Figure S1.** Magnetism in VS<sub>2</sub> and V-MoS<sub>2</sub> and its impact on transport. DOS of VS<sub>2</sub> (a) and V-MoS<sub>2</sub> (b) under different U values. Transfer characteristics of MoS<sub>2</sub> (c) and V-MoS<sub>2</sub> (d) with and without spin consideration at  $L_{\text{ch}} = 3$  nm.

The impact of magnetism on the transport characteristics was studied. First, the density of states (DOS) of VS<sub>2</sub> and V-MoS<sub>2</sub> under different U values was calculated.

As shown in **Fig. S1a,b**, the  $U$  value only altered the band edge positions of  $VS_2$  without affecting its metallic nature, and had negligible impact on  $V-MoS_2$ , where the  $V$ -doped state persists to be spin polarized. Then, a model system with a channel length of 3 nm was used to calculate the transfer characteristics considering magnetism. As shown in **Fig. S1c**, since the  $MoS_2$  has no inherent magnetism, the two curves with and without considering spin overlap almost entirely. However, regarding the transfer characteristics of  $V-MoS_2$ , we can see that when magnetism is considered, the transconductance peak in the subthreshold region (as shown in **Fig. 3d** of the main text) splits into two kinks marked by blue and green arrows in **Fig. S1d**. This phenomenon possibly originates from the Coulomb splitting effect where the interaction of spin-up and spin-down electrons strongly depends on the spatial extension of the localized doping state (*Science* **2016**, 352, 437-441). Importantly, it should be noted that although magnetism does affect the transport behavior of  $V-MoS_2$ , this does not change our key conclusion that the  $V$ -doped state can induce the assisted-tunneling effect under short-channel conditions.

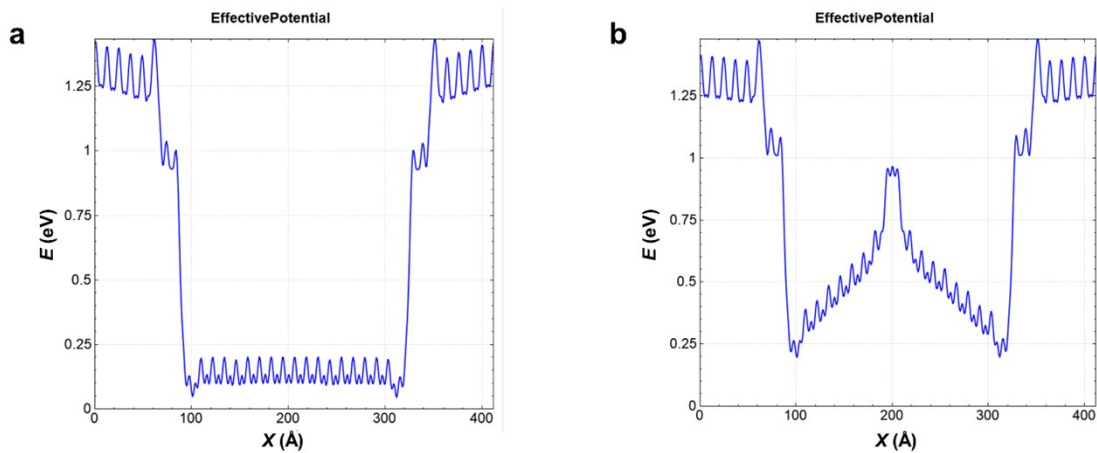

**Figure S2.** The effective potential of  $VS_2-MoS_2-VS_2$  (a) and  $VS_2-V$  doped  $MoS_2-VS_2$  (b) device.

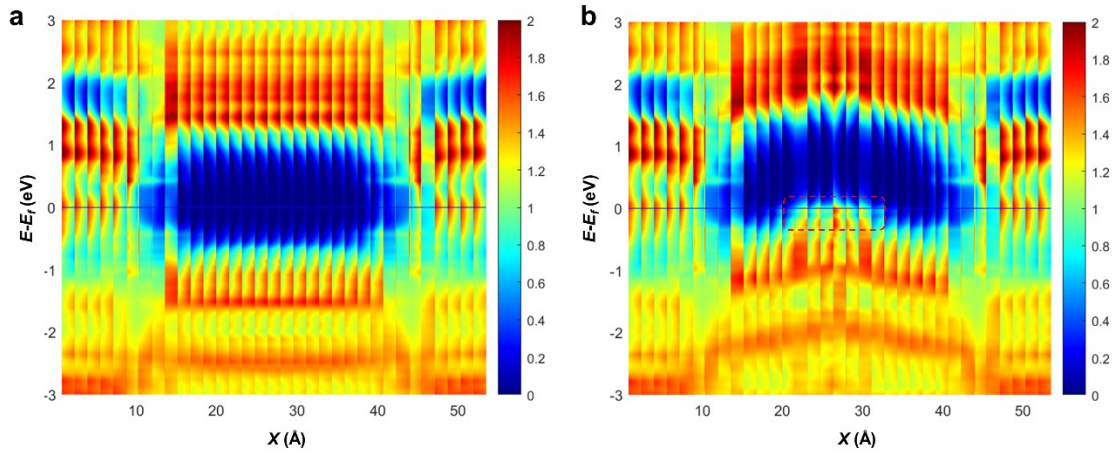

**Figure S3.** PDOS of  $\text{VS}_2\text{-MoS}_2\text{-VS}_2$  (a) and  $\text{VS}_2\text{-V doped MoS}_2\text{-VS}_2$  (b) device without bias and gate voltage.

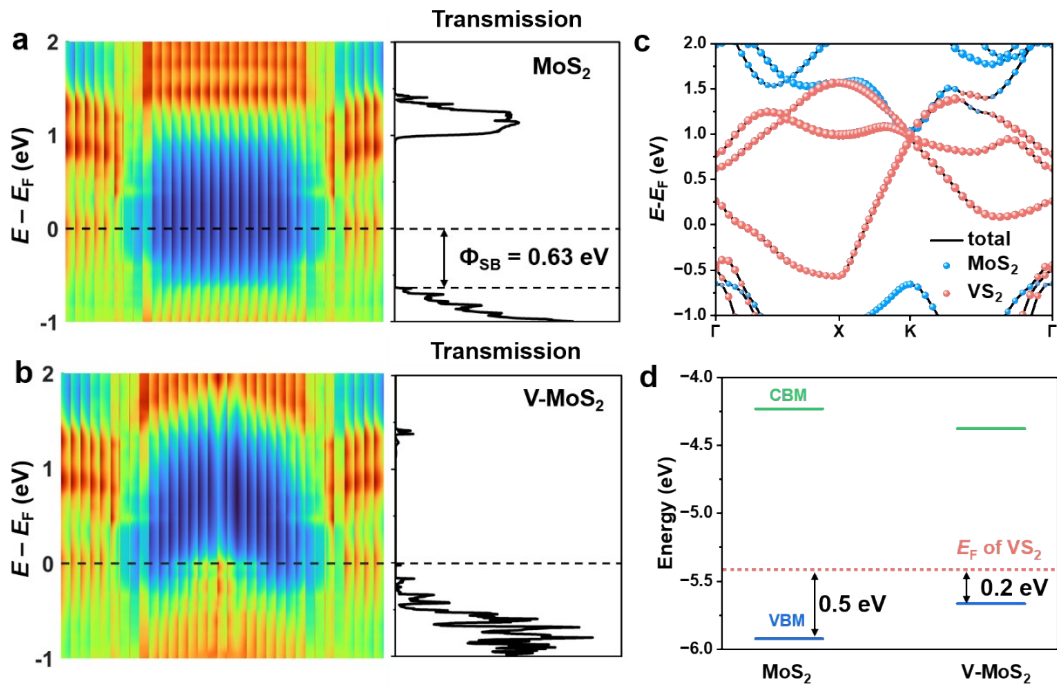

**Figure S4.** PDOS and electron transmission spectra for the  $\text{VS}_2\text{-MoS}_2\text{-VS}_2$  (a) and  $\text{VS}_2\text{-V doped MoS}_2\text{-VS}_2$  (b) at equilibrium with  $L_{\text{ch}} = 3$  nm. (c) Projected band structure of the  $\text{VS}_2\text{-MoS}_2$  out-plane heterojunction. (d) The band edges of the two materials and the Fermi level of  $\text{VS}_2$  relative to the vacuum level.

To elucidate the contact types, the projected density of states (PDOS) and electronic transmission spectrum of the device at equilibrium with a channel length  $L_{\text{ch}} = 3$  nm was first calculated. As shown in **Fig. S4a**, when the channel material is pristine  $\text{MoS}_2$ , a p-type Schottky contact is formed. From the transmission spectrum, the

Schottky barrier height for holes is determined to be 0.63 eV. When the channel material is V-MoS<sub>2</sub>, as depicted in **Fig. S4b**, the Schottky barrier at this channel length is almost negligible due to the assisted-tunneling effect of V atoms, manifesting as a quasi-Ohmic contact. Furthermore, we also computed the contact properties of vertical VS<sub>2</sub>/MoS<sub>2</sub> heterojunctions using the DS-PAW software. As illustrated in **Fig. S4c,d**, a p-type Schottky contact is also formed between MoS<sub>2</sub> and VS<sub>2</sub>, with a Schottky barrier height of 0.5 eV (this value differs from the in-plane Schottky barrier height due to the different functionals used for Nanodcal and DS-PAW). Besides, for the vertical VS<sub>2</sub>/V-MoS<sub>2</sub> heterojunction, a significantly lowered hole Schottky barrier of 0.2 eV is revealed, highlighting the vital role of V-doped states in modifying the interface properties.

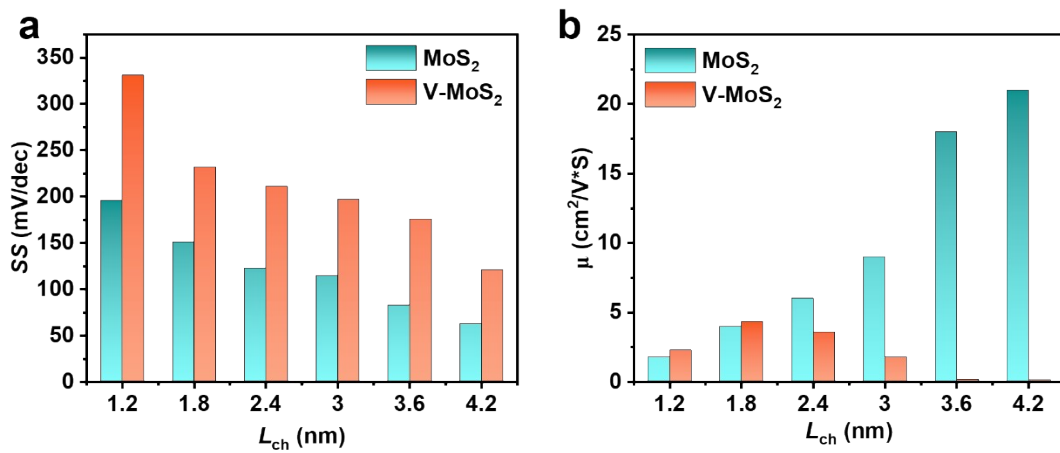

**Figure S5.** Subthreshold swing (a) and carrier mobility (b) at different channel lengths.

As observed in **Fig. S5a**, the subthreshold swing (SS) exhibits an increasing trend with decreasing channel length, which is a typical characteristic of the short-channel effect. Furthermore, as shown in **Fig. S5b**, when the channel length is less than 1.8 nm, the carrier mobility of the V-MoS<sub>2</sub> is slightly higher than that of MoS<sub>2</sub>, owing to the assisted tunneling effect induced by the V dopants. Conversely, when the channel length exceeds 2.4 nm, the assisted tunneling effect is suppressed in the on-state, and the impurity scattering becomes the dominant mechanism, leading to a lower carrier mobility than that of MoS<sub>2</sub>.

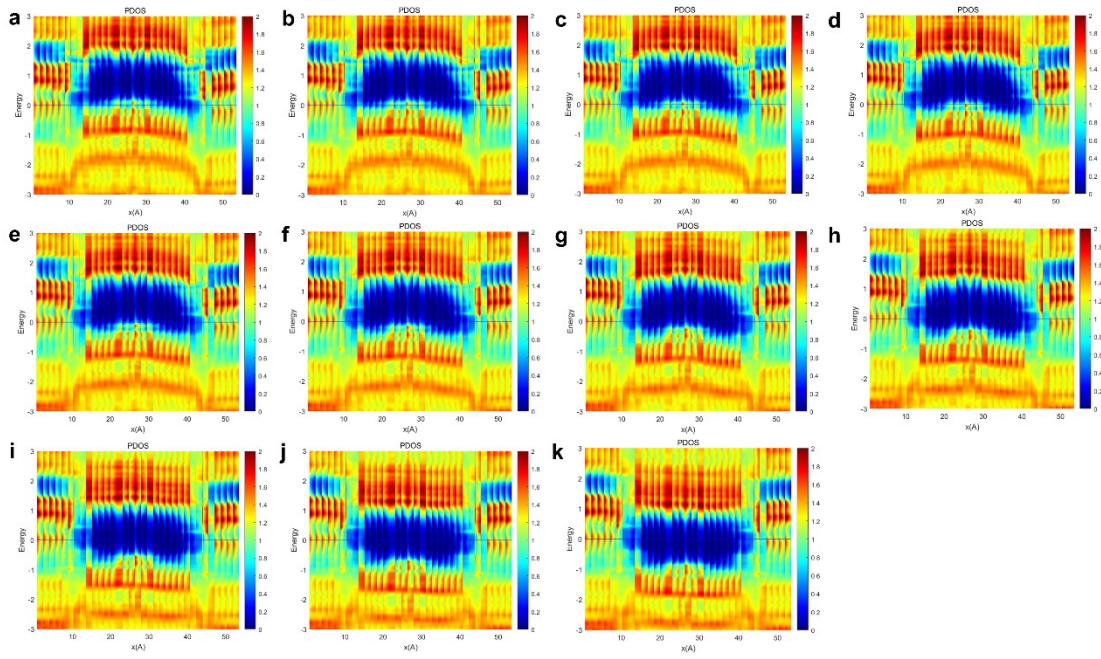

**Figure S6.** PDOS of VS<sub>2</sub>-V doped MoS<sub>2</sub>-VS<sub>2</sub> device under the gate voltage varying from 1 V to -1 V (a-k).

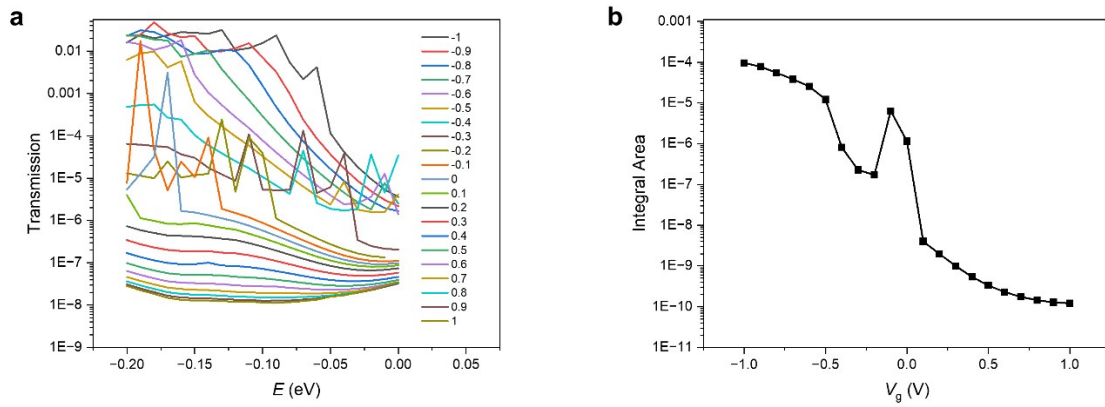

**Figure S7.** The transmission coefficient for gate voltage ranging from -1 V to 1 V (a) and corresponding integral area (b).
